# Supplementary material for: Evolution of CD8+ T Cell Receptor (TCR) Engineered Therapies for the Treatment of Cancer
Source: MDPI journal article supplement (doi:10.3390/cells10092379), 2021-09-10
Supplement: s1 [file s1]

A.

### Academia/government department that working on TCR-T therapy

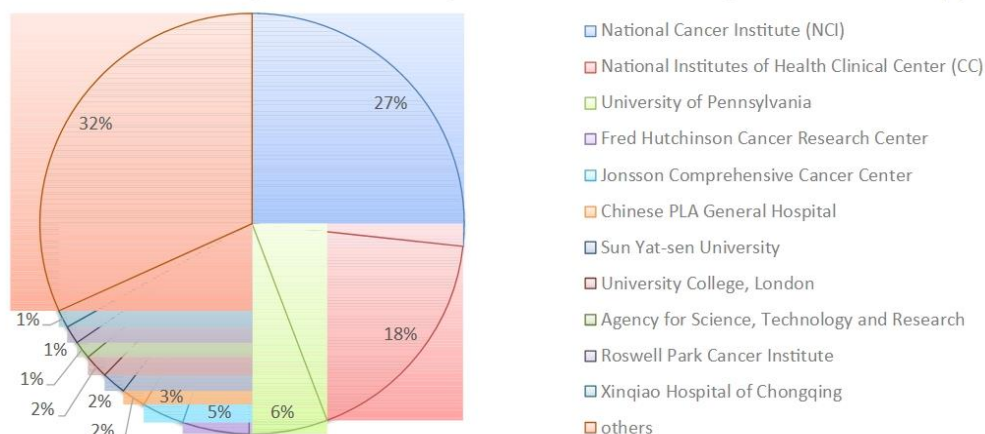

SPPLEMENTAL FIGURE 1

B.

### Private companies developing TCR-T cell therapy

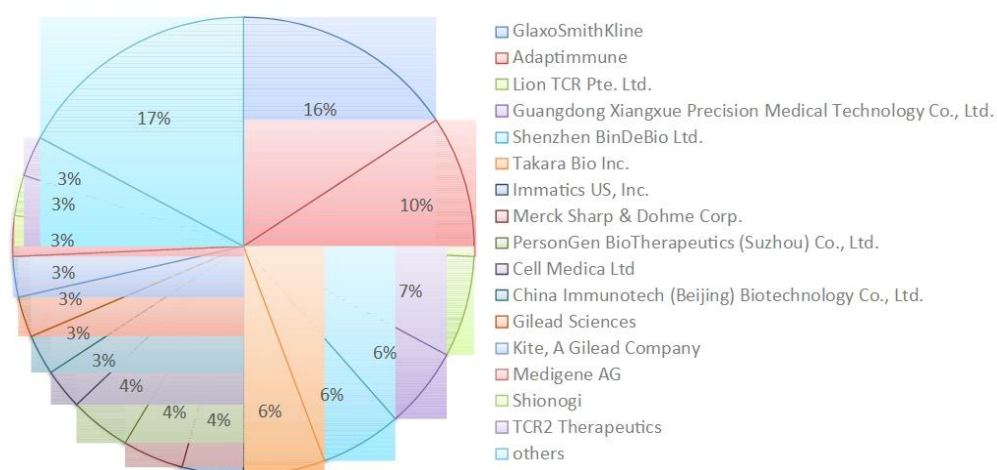

SPPLEMENTAL FIGURE 1

**Supplemental Fig.1** Academic sponsor/collaborators that working on TCR-T therapy(A), and private companies involved in TCR-T therapy (B). Percentages represents the proportion of numbers of TCR-T clinical trials at each institution.
